# PSYCHIATRIC SERVICES

A Journal of the  
American Psychiatric  
Association

- ◆ Service Delivery  
Using the Internet:  
Two New Studies
- ◆ CAM Treatment Use  
in Specialty Care for  
Veterans With PTSD
- ◆ Patient-Centered  
Outcomes Research:  
Priority Guidelines
- ◆ Improving Prediction  
of Violence Risk With  
Structured Assessment

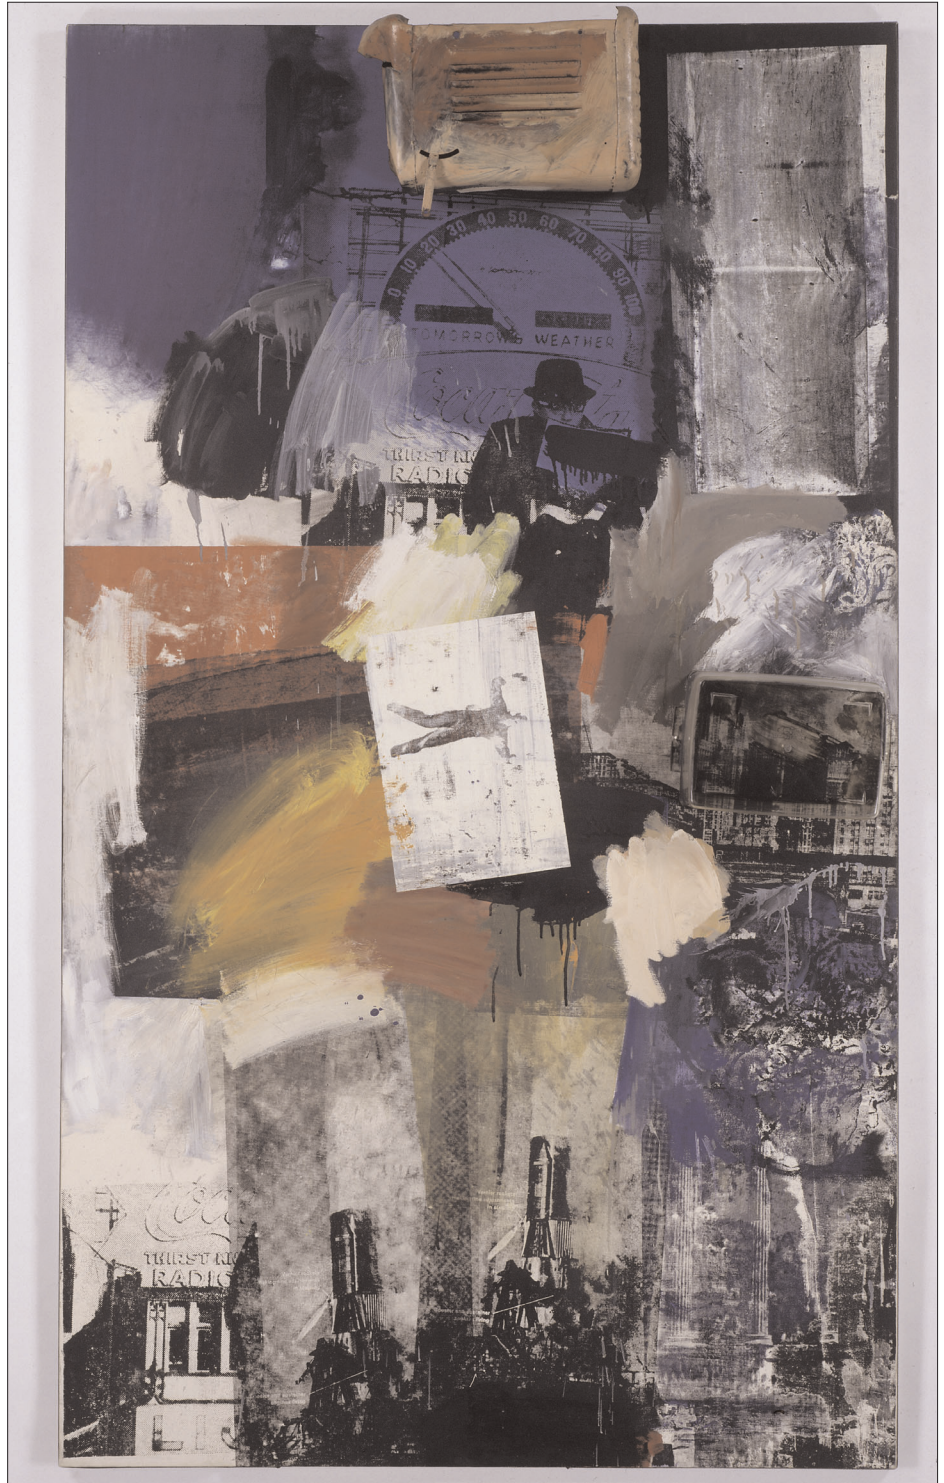

Source: https://psychiatryonline.org/doi/suppl/10.1176/ps.2012.63.issue-11/suppl_file/cover.pdf
